# Supplementary material for: Assessment of the Cholesterol-Lowering Effect of MOMAST®: Biochemical and Cellular Studies
Source: MDPI journal article supplement (doi:10.3390/nu14030493), 2022-01-23
Supplement: s1 [file s1]

Technical data and analysis sheets of MOMAST<sup>®</sup> provided by Bioenutra S.r.l.



**BIOENUTRA S.r.l.**  
TECNOLOGIE INNOVATIVE PER L'UOMO E L'AMBIENTE  
Sede istituzionale: IV Traversa da S.P. Bandiera, snc - 74013 Ginosa (+39TA)  
[info@bioenutra.com](mailto:info@bioenutra.com) - [www.bioenutra.com](http://www.bioenutra.com)

PRODUCT SPECIFICATIONS: MOMAST Plus BIO – Liquid  
(Product from Organic raw material)

| GENERAL SPECIFICATIONS                              |                                                                                             |
|-----------------------------------------------------|---------------------------------------------------------------------------------------------|
| CAS N°: 84913-27-1<br>(OLEA EUROPAEA FRUIT EXTRACT) | MOMAST Plus BIO: Polyphenolic complex rich in hydroxytyrosol and other polyphenols (Liquid) |
| Appearance                                          | Brown to dark brown slightly viscous Liquid                                                 |
| Total polyphenols content (HPLC)                    | > 60 g/kg<br>(See Details in Biophenolic Composition Table)                                 |
| Loss On Drying (%)                                  | ~ 45%                                                                                       |
| Pesticides Residue                                  | Negative                                                                                    |
| Bulk Density                                        | ~ 1.2 kg/dm <sup>3</sup>                                                                    |
| Microbial Limits:                                   |                                                                                             |
| - Total Aerobic Microbial Count                     | ≤ 10 <sup>3</sup> CFU/g                                                                     |
| - Total Combined Yeast & Molds count                | ≤ 10 <sup>3</sup> CFU/g                                                                     |
| - E. Coli                                           | Absent / 10 g                                                                               |
| - Salmonella Sp.                                    | Absent / 10 g                                                                               |
| - S. Aureus                                         | Absent / 10 g                                                                               |

| BIOPHENOLIC COMPOSITION TABLE<br>(Last HPLC analysis: 15/3/2021) |                |                           |
|------------------------------------------------------------------|----------------|---------------------------|
| Main Active molecules                                            | Specifications | Production lot: 820-01/PL |
| Hydroxytyrosol                                                   | 4-6%           | 4,35%                     |
| Tyrosol                                                          | 0,4-1,5%       | 0,95%                     |
| Verbascoside                                                     | 0,02-0,5%      | 0,46%                     |
| Oleuropein                                                       | 0,0-1%         | 0,02%                     |
| Other olives polyphenols                                         | 0,5-3,5%       | 0,68%                     |
| Total Polyphenols                                                | >6,0%          | 6,47%                     |

**Scheda Tecnica Prodotto MOMAST<sup>®</sup> Plus BIO**  
Revisione: 31.10.2021      Versione: 2.0  
Data di stampa: 31.10.2021

**Product name**  
MOMAST Plus BIO - Complesso polifenolico ricco in idrossitirosole ed altri polifenoli da olive biologiche – Liquid

**Produttore/fornitore**  
BIOENUTRA SRL  
Paese d'origine: Italia  
Regione: Puglia

Natura del Prodotto: **Naturale**  
Piante: **OLEA EUROPEA**  
Parte: **Frutto**  
Condizioni di crescita: Coltivata  
Periodo di raccolta materia prima: Ottobre - Marzo

INCI: OLEA EUROPAEA (OLIVE) FRUIT EXTRACT  
CAS NUMBER: 84012-27-1 EINECS: n/a  
Codice doganale: 1302 1300 90

**Tipo di prodotto:**      Preparato di origine vegetale per uso nutraceutico  
                                         Aroma Naturale

**Composizione qualitativa**  
Ingredienti: Acqua, estratto di olive (frutto)

**Composizione percentuale indicativa**  
4-6% idrossitirosole  
0,4-1,5% tirosole  
0,02-0,5% verbascoside  
0,0-1% oleuropeina  
0,5-3,5% altri polifenoli dell'oliva  
20-30% zuccheri ed altri componenti naturalmente presenti nel frutto dell'oliva  
30-50% acqua

**CARATTERISTICHE CHIMICO FISICHE TIPICHE**  
**Aspetto:** liquido, base acquosa  
**Pinta usata:** acque di vegetazione ricavate dalla lavorazione in prima spremitura delle olive della varietà Coratina (cultivar autoctona pugliese), provenienti da coltivazioni biologiche.  
**Colore:** marrone  
**Odore:** caratteristico intenso  
**Ph:** 5-5,5  
**Intervallo punto di ebollizione:** 98-102°C  
**Densità a 20°C:** 1.2 g/cm3

**Scheda Tecnica Prodotto MOMAST<sup>®</sup> Plus BIO**  
Revisione: 31.10.2021      Versione: 2.0  
Data di stampa: 31.10.2021

**Solubilità:** solubile in acqua  
**Altri solventi:** solubile in alcool e glicerina  
**Carica batterica totale** < 100 ufc/g  
**Patogeni:** assenti  
**Conducibilità:** 22680 µS/cm  
**Poliifenoli totali:** >60 g/kg

**RACCOMANDAZIONI DI UTILIZZO**  
Il prodotto è indicato per l'utilizzo nutraceutico quale ingrediente attivo con proprietà antiossidanti o come Aroma Naturale in preparati alimentari.  
Concentrazioni di utilizzo indicate: secondo le esigenze del responsabile della formulazione  
Conservare in luogo fresco ed evitare l'esposizione prolungata all'aria, al calore ed alla luce. Evitare l'utilizzo in associazione a sostanze ossidanti.  
Il prodotto ha Ph acido.

**NOTE**  
Preparato di origine vegetale conforme al Decreto Ministeriale 9/7/2012 e 10/8/2018  
Aroma Naturale conforme al Reg. UE 1134/2008 (AROMI ED INGREDIENTI AROMATIZZANTI)  
Esente da allergeni alimentari (Reg. 1169/2011/UE)  
Esente da OGM (Reg. 1829-1830/2003/CE)  
Materia Prima proveniente da agricoltura biologica  
Non contiene derivati di origine animale  
Nel processo produttivo non si impiegano solventi organici  
Indicato per vegetariani e vegani  
Adatto alla dieta Halal e Kosher

**CONTATTI**  
Bioenutra S.R.L.  
IV Traversa da S.P. Bandiera, snc  
Ginosa (TA) 74013  
[info@bioenutra.com](mailto:info@bioenutra.com)  
+39 099 4502234

Table S1. Product and lot number details of antibodies used.

| AB      | Lot. N      | Product    |
|---------|-------------|------------|
| BACTIN  | 07M4799V    | A5441      |
| HMGCoAR | GR211866-24 | Ab174830   |
| LDLR    | VB2951773A  | PA5-22976  |
| PCSK9   | 41752       | GTX129859  |
| HNF1α   | 41080       | GTX 113850 |
| SREBP2  | K1913       | Sc-13552   |

Sample Name: Momast PLUS L B20-01

```
=====
Acq. Operator   : SYSTEM
Sample Operator : SYSTEM
Acq. Instrument : HPLC 1220           Location : 1
Injection Date  : 3/15/2021 3:11:13 PM
                                           Inj Volume : Manually
Acq. Method     : C:\CHEM32\1\METHODS\Q-SHORT-2019.M
Last changed    : 3/15/2021 1:18:01 PM by SYSTEM
                  (modified after loading)
Analysis Method : C:\CHEM32\1\METHODS\Q-SHORT-2019.M
Last changed    : 3/15/2021 3:48:29 PM by SYSTEM
                  (modified after loading)
Sample Info     : Momast PLUS L B20-01
                  Campione: 0.025mg+ 0.6 mg S.I.+ 1.3Meoh
=====
```

Sample-related custom fields:

```
Name | Value
-----|-----
Additional Info : Peak(s) manually integrated
=====
```

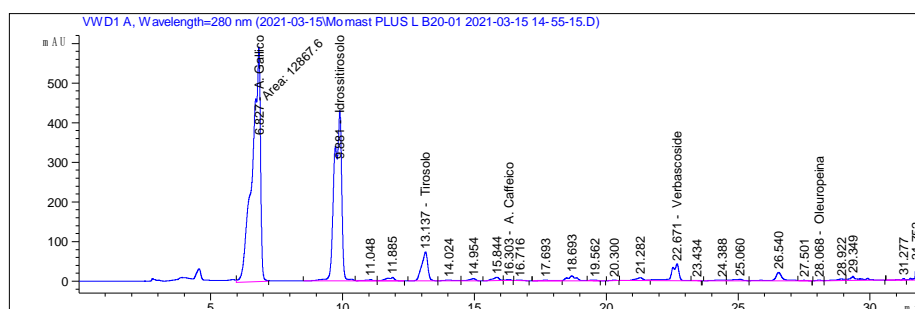

## Internal Standard Report

```
=====
Sorted By      : Signal
Calib. Data Modified : 3/15/2021 3:47:21 PM
Multiplier     : 1.0000
Dilution       : 80.0000
Use Multiplier & Dilution Factor with ISTDs
Sample ISTD Information:
ISTD ISTD Amount Name
# [mg/kg]
-----|-----
1 300.00000 A. Gallico
=====
```

Sample Name: Momast PLUS L B20-01

```

=====
Acq. Operator   : SYSTEM
Sample Operator : SYSTEM
Acq. Instrument : HPLC 1220                      Location : 1
Injection Date  : 3/15/2021 3:11:13 PM
                                           Inj Volume : Manually
Acq. Method     : C:\CHEM32\1\METHODS\Q-SHORT-2019.M
Last changed    : 3/15/2021 1:18:01 PM by SYSTEM
                  (modified after loading)
Analysis Method : C:\CHEM32\1\METHODS\Q-SHORT-2019.M
Last changed    : 3/15/2021 3:48:29 PM by SYSTEM
                  (modified after loading)
Sample Info     : Momast PLUS L B20-01
                  Campione: 0.025mg+ 0.6 mg S.l.+ 1.3Meoh

```

Sample-related custom fields:

```

Name | Value
-----|-----
Additional Info : Peak(s) manually integrated
=====

```

Signal 1: VWD1 A, Wavelength=280 nm

| RetTime<br>[min] | Type | ISTD<br>used | Area<br>[mAU*s] | Amt/Area<br>ratio | Amount<br>[mg/kg] | Grp | Name          |
|------------------|------|--------------|-----------------|-------------------|-------------------|-----|---------------|
| 6.827            | MM   | I            | 1 1.28676e4     | 1.00000           | 2.40000e4         |     | A. Gallico    |
| 9.881            | BV   | R            | 1 8114.22949    | 2.87595           | 4.35253e4         |     | Idrossitirolo |
| 13.137           | BB   |              | 1 1163.19373    | 4.38726           | 9518.29981        |     | Tirolo        |
| 16.303           | VB   |              | 1 33.20021      | 0.00000           | 0.00000           |     | A. Caffeeico  |
| 22.671           | VV   | R            | 1 808.54376     | 3.07737           | 4640.84889        |     | Verbascoside  |
| 28.068           | BB   |              | 1 16.12370      | 7.28050           | 218.94723         |     | Oleuropeina   |

Totals without ISTD(s) : 5.79034e4

Uncalibrated Peaks : using compound Idrossitirolo

| RetTime<br>[min] | Type | ISTD<br>used | Area<br>[mAU*s] | Amt/Area<br>ratio | Amount<br>[mg/kg] | Grp | Name |
|------------------|------|--------------|-----------------|-------------------|-------------------|-----|------|
| 11.048           | VV   | E            | 61.35201        | 9.07951e-2        | 10.38974          | ?   |      |
| 11.885           | VB   | E            | 184.95044       | 1.96623           | 678.27248         | ?   |      |
| 14.024           | BV   |              | 49.11551        | 0.00000           | 0.00000           | ?   |      |
| 14.954           | VB   |              | 89.37666        | 9.70752e-1        | 161.82520         | ?   |      |
| 15.844           | BV   |              | 143.59846       | 1.69815           | 454.82086         | ?   |      |
| 16.716           | BB   |              | 22.58212        | 0.00000           | 0.00000           | ?   |      |
| 17.693           | BV   | E            | 53.56312        | 0.00000           | 0.00000           | ?   |      |
| 18.693           | VV   | R            | 286.33420       | 2.29585           | 1226.11487        | ?   |      |
| 19.562           | VB   | E            | 25.67476        | 0.00000           | 0.00000           | ?   |      |
| 20.300           | BB   |              | 16.83798        | 0.00000           | 0.00000           | ?   |      |
| 21.282           | BV   | E            | 143.47691       | 1.69714           | 454.16404         | ?   |      |
| 23.434           | VB   | E            | 8.00803         | 0.00000           | 0.00000           | ?   |      |
| 24.388           | BV   |              | 48.25426        | 0.00000           | 0.00000           | ?   |      |
| 25.060           | VB   |              | 85.04366        | 8.72600e-1        | 138.41118         | ?   |      |
| 26.540           | BV   | R            | 369.71191       | 2.43146           | 1676.65890        | ?   |      |

Sample Name: Momast PLUS L B20-01

```

=====
Acq. Operator   : SYSTEM
Sample Operator : SYSTEM
Acq. Instrument : HPLC 1220                      Location : 1
Injection Date  : 3/15/2021 3:11:13 PM
                                           Inj Volume : Manually
Acq. Method     : C:\CHEM32\1\METHODS\Q-SHORT-2019.M
Last changed    : 3/15/2021 1:18:01 PM by SYSTEM
                  (modified after loading)
Analysis Method : C:\CHEM32\1\METHODS\Q-SHORT-2019.M
Last changed    : 3/15/2021 3:48:29 PM by SYSTEM
                  (modified after loading)
Sample Info     : Momast PLUS L B20-01
                  Campione: 0.025mg+ 0.6 mg S.l.+ 1.3Meoh

```

Sample-related custom fields:

```

Name | Value
-----|-----
Additional Info : Peak(s) manually integrated
=====

```

| RetTime<br>[min] | Type | ISTD<br>used | Area<br>[mAU*s] | Amt/Area<br>ratio | Amount<br>[mg/kg] | Grp | Name |
|------------------|------|--------------|-----------------|-------------------|-------------------|-----|------|
| 27.501           | VB E |              | 14.99064        | 0.00000           | 0.00000           | ?   |      |
| 28.922           | BV   |              | 90.28904        | 9.90218e-1        | 166.75536         | ?   |      |
| 29.349           | VB   |              | 251.28638       | 2.21199           | 1036.72870        | ?   |      |
| 31.277           | BV E |              | 37.76133        | 0.00000           | 0.00000           | ?   |      |
| 31.752           | VBAR |              | 221.97673       | 2.12151           | 878.34961         | ?   |      |

Uncalib. totals : 6882.49096

10 Warnings or Errors :

```

Warning : Negative results set to zero (cal. curve intercept)
Warning : Negative results set to zero (cal. curve intercept), (A. Caffaico)
Warning : Negative results set to zero (cal. curve intercept)
Warning : Negative results set to zero (cal. curve intercept)
Warning : Negative results set to zero (cal. curve intercept)
Warning : Negative results set to zero (cal. curve intercept)
Warning : Negative results set to zero (cal. curve intercept)
Warning : Negative results set to zero (cal. curve intercept)
Warning : Negative results set to zero (cal. curve intercept)
Warning : Negative results set to zero (cal. curve intercept)

```

```

=====
*** End of Report ***

```
